# Supplementary material
Source: PubMed Central journal article supplement (PMC8594913)
Supplement: NIHMS1750488-supplement-Suplementary_Tables_1-5.pdf [file NIHMS1750488-supplement-Suplementary_Tables_1-5.pdf]

---

## Supplementary information

---

# **Discovery of a first-in-class reversible DNMT1-selective inhibitor with improved tolerability and efficacy in acute myeloid leukemia**

---

In the format provided by the  
authors and unedited

**Supplementary Data Table 1.** High-throughput screen.

| Category          | Parameter                                | Description                                                                                                                                                                                                                                   |
|-------------------|------------------------------------------|-----------------------------------------------------------------------------------------------------------------------------------------------------------------------------------------------------------------------------------------------|
| Assay             | Type of assay                            | <i>In vitro</i> enzymatic scintillation proximity assay (SPA)                                                                                                                                                                                 |
|                   | Target                                   | DNMT1 (Gene ID 1786, UniProt P26358)                                                                                                                                                                                                          |
|                   | Primary measurement                      | DNMT1 methyltransferase activity measuring the transfer of a [ <sup>3</sup> H]-methyl group from <sup>3</sup> H-SAM to a cytidine contained within a hemi-methylated DNA substrate. Inhibition of DNMT1 was measured as a decrease in signal. |
|                   | Key reagents                             | DNMT1 (601-1600, Proteros), <sup>3</sup> H-SAM (American Radiolabeled Chemicals Inc), 40-mer hemi-methylated DNA duplex (IDT), PEI PS Imaging beads (PerkinElmer)                                                                             |
|                   | Assay protocol                           | See Methods: High-throughput screen                                                                                                                                                                                                           |
|                   | Additional comments                      | Radioactive assay                                                                                                                                                                                                                             |
| Library           | Library size                             | 1,842,902                                                                                                                                                                                                                                     |
|                   | Library composition                      | Small molecule                                                                                                                                                                                                                                |
|                   | Source                                   | GlaxoSmithKline                                                                                                                                                                                                                               |
| Screen            | Format                                   | 1536 well (Greiner 782075)                                                                                                                                                                                                                    |
|                   | Concentration(s) tested                  | Final: 10 $\mu$ M compound, 1% DMSO                                                                                                                                                                                                           |
|                   | Plate controls                           | High: no compound; Low: no enzyme                                                                                                                                                                                                             |
|                   | Reagent/ compound dispensing system      | Reagents: Multidrop Combi (Thermo Scientific); Compound: Echo Acoustic Dispenser (Labcyte)                                                                                                                                                    |
|                   | Detection instrument and software        | Viewlux (PerkinElmer)                                                                                                                                                                                                                         |
|                   | Assay validation/QC                      | Mean z' = 0.69 (1349/1354 plates passed)                                                                                                                                                                                                      |
|                   | Correction factors                       | None                                                                                                                                                                                                                                          |
|                   | Normalization                            | Raw data normalization to % inhibition (relative to control wells)                                                                                                                                                                            |
| Post-HTS analysis | Hit criteria                             | $\geq 30\%$ Inhibition                                                                                                                                                                                                                        |
|                   | Hit rate                                 | 0.44% (8034/1842902)                                                                                                                                                                                                                          |
|                   | Additional assay(s)                      | Single-shot confirmation and IC <sub>50</sub> determination in primary assay. Non-specific DNA binding, DNMT1 (FL) fluorescence-coupled breakthrough assay.                                                                                   |
|                   | Confirmation of hit purity and structure | Compounds were resynthesized                                                                                                                                                                                                                  |
|                   | Additional comments                      | The majority of hits were subsequently filtered for nuisance liabilities such as assay chemistry (typically inactive after purification) and IFI (inhibitory frequency index).                                                                |
|                   |                                          |                                                                                                                                                                                                                                               |

**Supplementary Data Table 2.** Structure-Activity Relationship (SAR).

| Compound Number                     | Structure                                                                           | DNMT1 IC <sub>50</sub> (μM) <sup>a</sup> | chromLogD pH7.4 <sup>b</sup> | FaSSIF <sup>c</sup> (μg/mL) |
|-------------------------------------|-------------------------------------------------------------------------------------|------------------------------------------|------------------------------|-----------------------------|
| <b>GW623415X</b><br>HTS hit         | 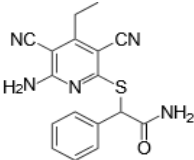   | 2.78 ± 0.25 (n=26)                       | 4.1                          | 5                           |
| <b>GSK3510477</b>                   | 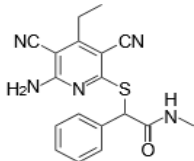   | >10 (n=6) <sup>d</sup>                   | 4.5                          | 6                           |
| <b>GSK3482364</b>                   | 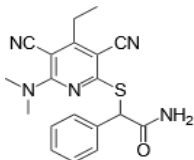   | 0.43 ± 0.25 (n=22)                       | 4.9                          | < 1.6                       |
| <b>GSK3484862</b><br>(R)-enantiomer | 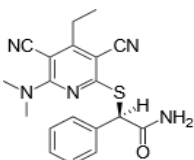  | 0.23 ± 0.02 (n=34)                       | 4.9                          | < 1                         |
| <b>GSK3484861</b><br>(S)-enantiomer | 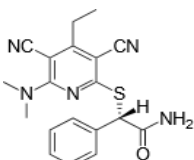 | >10 (n=6) <sup>d</sup>                   | 4.9                          | 1                           |
| <b>GSK3730808</b>                   | 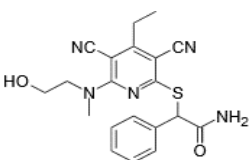 | 1.81 ± 0.11 (n=4)                        | 4.0                          | 7.4                         |
| <b>GSK3685032</b>                   | 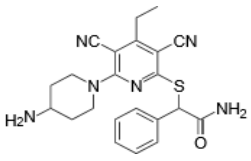 | 0.17 ± 0.02 (n=12)                       | 2.7                          | 165                         |

<sup>a</sup> Fluorescence-coupled breaklight assay; n = biologically independent replicates; average ± SEM

<sup>b</sup> Measure of compound lipophilicity

<sup>c</sup> Measure of compound solubility

<sup>d</sup> Value adjusted based on solubility, experimentally IC<sub>50</sub> > top dose tested (200-500 μM)

**Supplemental Data Table 3.** GSK3685032 inhibition of a methyltransferase panel.

| Assay Format                              | Enzyme        | Substrate         | GSK3685032                  |                           | SAH <sup>a</sup>            |
|-------------------------------------------|---------------|-------------------|-----------------------------|---------------------------|-----------------------------|
|                                           |               |                   | IC <sub>50</sub> (μM) ± SEM |                           | IC <sub>50</sub> (μM) ± SEM |
| Radioactive Scintillation Proximity Assay | DNMT1         | DNA duplex        | 0.036 ± 0.001 (n=70)        |                           | 0.54 ± 0.02 (n=41)          |
|                                           | DNMT3A/3L     | DNA duplex        | > 100 (n=8)                 |                           | 0.10 ± 0.01 (n=10)          |
|                                           | DNMT3B/3L     | DNA duplex        | > 100 (n=8)                 |                           | 0.09 ± 0.01 (n=10)          |
| Assay Format                              | Enzyme        | Substrate         | IC <sub>50</sub> (μM)       | % Inhibition <sup>b</sup> | IC <sub>50</sub> (μM)       |
| Radioactive HotSpot Technology            | ASH1L         | Nucleosomes       | > 10                        | -2                        | ND                          |
|                                           | DOT1L         | Nucleosomes       | > 10                        | 1                         | 0.3                         |
|                                           | EZH1 Complex  | Core Histone      | > 10                        | 15                        | 13.9                        |
|                                           | EZH2 Complex  | Core Histone      | > 10                        | -4                        | 40.8                        |
|                                           | G9a           | Histone H3 (1-21) | > 10                        | 10                        | 1.2                         |
|                                           | GLP           | Histone H3 (1-21) | > 10                        | 12                        | 1.2                         |
|                                           | METTL21A      | HSPA8-[CTD]       | > 10                        | 16                        | 51.5                        |
|                                           | MLL1 Complex  | Nucleosomes       | > 10                        | 17                        | 0.3                         |
|                                           | MLL2 Complex  | Nucleosomes       | > 10                        | 7                         | 10.0                        |
|                                           | MLL3 Complex  | Core Histone      | > 10                        | -6                        | 4.3                         |
|                                           | MLL4 Complex  | Nucleosomes       | > 10                        | 17                        | 0.8                         |
|                                           | NRMT1         | RCC1              | > 10                        | 9                         | 0.3                         |
|                                           | NRMT2         | RCC1              | > 10                        | 0                         | 0.7                         |
|                                           | NSD1          | Nucleosomes       | > 10                        | 11                        | 2.4                         |
|                                           | NSD2          | Nucleosomes       | > 10                        | 9                         | 2.4                         |
|                                           | NSD3          | Nucleosomes       | > 10                        | 16                        | ND                          |
|                                           | PRDM9         | Histone H3        | > 10                        | -25                       | ND                          |
|                                           | PRMT1         | Histone H4        | > 10                        | 4                         | 0.1                         |
|                                           | PRMT3         | Histone H4        | > 10                        | 7                         | 0.5                         |
|                                           | PRMT4         | Histone H3        | > 10                        | -5                        | 0.1                         |
|                                           | PRMT5/MEP50   | Histone H2A       | > 10                        | 10                        | 0.6                         |
|                                           | PRMT6         | GST-GAR           | > 10                        | -2                        | 0.2                         |
|                                           | PRMT7         | GST-GAR           | > 10                        | 6                         | 0.0                         |
|                                           | PRMT8         | Histone H4        | > 10                        | 16                        | 0.1                         |
|                                           | SET1b Complex | Core Histone      | > 10                        | 34                        | 3.1                         |
|                                           | SET7/9        | Core Histone      | > 10                        | 9                         | 58.3                        |
|                                           | SET8          | Nucleosomes       | > 10                        | 12                        | ND                          |
|                                           | SETD2         | Nucleosomes       | > 10                        | -10                       | 1.9                         |
|                                           | SMYD2         | Histone H4        | > 10                        | 0                         | ND                          |
|                                           | SMYD3         | MEKK2             | > 10                        | 7                         | 31.1                        |
|                                           | SUV39H1       | Histone H3        | > 10                        | -30                       | 104.9                       |
|                                           | SUV39H2       | Histone H3        | > 10                        | -6                        | 39.9                        |
|                                           | SUV420H1 TV2  | Nucleosomes       | > 10                        | 8                         | 70.9                        |
|                                           | S-COMT        | RBC-DA1           | > 10                        | 1                         | ND                          |

<sup>a</sup> The product inhibitor, SAH, was included as a control inhibitor.

<sup>b</sup> Inhibition (%) values listed are at 10 μM GSK3685032.

N=1 biological replicate unless otherwise noted.

**Supplementary Data Table 4.** Summary of X-ray data collection at wavelength=1Å (APS-SERCAT-22ID) and refinement statistics in space group C2

| Inhibitor                                                       | None                    | GSK3685032             | GSK3830052             |
|-----------------------------------------------------------------|-------------------------|------------------------|------------------------|
| Date of data collection                                         | 10/2018                 | 06/2019                | 10/2019                |
| PDB Code                                                        | 6X9I                    | 6X9K                   | 6X9J                   |
| Cell dimensions (Å)                                             | 161.89, 77.70, 115.41   | 161.32, 78.34, 117.07  | 160.06, 77.77, 116.72  |
| $\alpha=\gamma=90^\circ$ , $\beta$ (°)                          | 125.7                   | 125.8                  | 125.5                  |
| Resolution (Å)                                                  | 45.21-2.20 (2.33-2.20)* | 40.00-2.65 (2.74-2.65) | 34.92-1.79 (1.85-1.79) |
| <sup>a</sup> R <sub>merge</sub>                                 | 0.159 (0.821)           | 0.132 (0.749)          | 0.089 (0.739)          |
| R <sub>pim</sub>                                                | 0.076 (0.662)           | 0.048 (0.385)          | 0.036 (0.686)          |
| CC <sub>1/2</sub> , CC                                          | (0.453, 0.789)          | (0.545, 0.840)         | (0.365, 0.731)         |
| <sup>b</sup> <I/σI>                                             | 9.4 (1.6)               | 14.8 (1.7)             | 19.6 (0.9)             |
| Completeness (%)                                                | 95.3 (81.5)             | 98.6 (90.3)            | 94.5 (72.9)            |
| Redundancy                                                      | 4.3 (2.4)               | 7.9 (4.0)              | 6.7 (4.1)              |
| Observed reflections                                            | 236,316                 | 269,959                | 690,353                |
| Unique reflections                                              | 55,268 (4,682)          | 34,128 (3,087)         | 103,653 (7,967)        |
| <b>Refinement</b>                                               |                         |                        |                        |
| Resolution (Å)                                                  | 2.20                    | 2.69                   | 1.79                   |
| No. reflections                                                 | 55,112                  | 34,113                 | 103,497                |
| <sup>c</sup> R <sub>work</sub> / <sup>d</sup> R <sub>free</sub> | 0.194 / 0.225           | 0.182 / 0.228          | 0.200 / 0.229          |
| No. Atoms                                                       |                         |                        |                        |
| Protein                                                         | 6194                    | 6553                   | 6518                   |
| DNA                                                             | 487                     | 487                    | 487                    |
| SAH                                                             | 26                      | -                      | -                      |
| Inhibitor                                                       | -                       | 30                     | 32                     |
| Zn                                                              | 2                       | 2                      | 2                      |
| Solvent                                                         | 247                     | 225                    | 458                    |
| B Factors (Å <sup>2</sup> )                                     |                         |                        |                        |
| Protein                                                         | 70.2                    | 67.4                   | 53.2                   |
| DNA                                                             | 90.7                    | 107.6                  | 109.9                  |
| SAH                                                             | 41.1                    | -                      | -                      |
| Inhibitor                                                       | -                       | 74.3                   | 65.7                   |
| Zn                                                              | 90.8                    | 82.1                   | 54.9                   |
| Solvent                                                         | 56.9                    | 56.6                   | 49.9                   |
| <b>R.m.s. deviations</b>                                        |                         |                        |                        |
| Bond lengths (Å)                                                | 0.004                   | 0.004                  | 0.004                  |
| Bond angles (°)                                                 | 0.7                     | 0.7                    | 0.7                    |

\* Values in parenthesis correspond to highest resolution shell.

<sup>a</sup> R<sub>merge</sub> =  $\sum |I - \langle I \rangle| / \sum I$ , where I is the observed intensity and  $\langle I \rangle$  is the averaged intensity from multiple observations.

<sup>b</sup> <I/σI> = averaged ratio of the intensity (I) to the error of the intensity (σI).

<sup>c</sup> R<sub>work</sub> =  $\sum |F_{obs} - F_{cal}| / \sum |F_{obs}|$ , where F<sub>obs</sub> and F<sub>cal</sub> are the observed and calculated structure factors, respectively.

<sup>d</sup> R<sub>free</sub> was calculated using a randomly chosen subset (5%) of the reflections not used in refinement.

**Supplementary Data Table 5.** Analytical compound characterization

| Compound Number                              | LCMS <sup>a</sup><br>(m/z) | <sup>1</sup> H NMR <sup>b</sup>                                                                                                                                                                                                                                                                                                                 | Analytical HPLC <sup>c</sup><br>(purity)                                                                                                                                             | HRMS <sup>d</sup><br>(m/z)                                                                                                            |
|----------------------------------------------|----------------------------|-------------------------------------------------------------------------------------------------------------------------------------------------------------------------------------------------------------------------------------------------------------------------------------------------------------------------------------------------|--------------------------------------------------------------------------------------------------------------------------------------------------------------------------------------|---------------------------------------------------------------------------------------------------------------------------------------|
| <b>GSK3510477</b>                            | 352 [M+H] <sup>+</sup>     | <sup>1</sup> H NMR (300 MHz, DMSO-d <sub>6</sub> ) δ ppm 8.23 (d, <i>J</i> = 4.7 Hz, 1H), 7.91 (s, 2H), 7.63–7.53 (m, 2H), 7.41–7.24 (m, 3H), 5.55 (s, 1H), 2.69 (q, <i>J</i> = 7.6 Hz, 2H), 2.59 (d, <i>J</i> = 4.6 Hz, 3H), 1.18 (t, <i>J</i> = 7.5 Hz, 3H)                                                                                   | 96.8% (Rt 7.1 min, 254 nm)                                                                                                                                                           | [M+H] <sup>+</sup> calcd for C <sub>18</sub> H <sub>17</sub> N <sub>5</sub> OS, 352.1232; found, 352.1229                             |
| <b>GSK3482364</b>                            | 365.9 [M+H] <sup>+</sup>   | <sup>1</sup> H NMR (400 MHz, CDCl <sub>3</sub> ) δ ppm 7.47–7.43 (m, 2H), 7.42–7.34 (m, 3H), 6.55 (br s, 1H), 5.60 (br s, 1H), 5.43 (s, 1H), 3.40 (s, 6H), 2.92 (q, <i>J</i> = 7.6 Hz, 2H), 1.32 (t, <i>J</i> = 7.6 Hz, 3H)                                                                                                                     | 99.7% (Rt 4.2 min, 254 nm)                                                                                                                                                           | [M+H] <sup>+</sup> calcd for C <sub>19</sub> H <sub>19</sub> N <sub>5</sub> OS, 366.1389; found, 366.1398                             |
| <b>GSK3484862</b><br>( <i>R</i> )-enantiomer | 366.1 [M+H] <sup>+</sup>   | <sup>1</sup> H NMR (400 MHz, DMSO-d <sub>6</sub> ) δ ppm 7.92 (s, 1H), 7.55–7.47 (m, 2H), 7.42–7.28 (m, 4H), 5.58 (s, 1H), 3.34 (s, 6H), 2.75 (q, <i>J</i> = 7.6 Hz, 2H), 1.19 (t, <i>J</i> = 7.6 Hz, 3H)                                                                                                                                       | chiral purity > 99.8% ee (Rt 3.871 min, 270 nm); optical rotation: [α] <sub>D</sub> <sup>24</sup> (deg cm <sup>3</sup> g <sup>-1</sup> dm <sup>-1</sup> ) = -337 (c=0.2, chloroform) | [M+H] <sup>+</sup> calcd for C <sub>19</sub> H <sub>19</sub> N <sub>5</sub> OS, 366.1389; found, 366.1394                             |
| <b>GSK3484861</b><br>( <i>S</i> )-enantiomer | 366.2 [M+H] <sup>+</sup>   | <sup>1</sup> H NMR (400 MHz, DMSO-d <sub>6</sub> ) δ ppm 7.92 (s, 1H), 7.55–7.48 (m, 2H), 7.41–7.30 (m, 4H), 5.58 (s, 1H), 3.34 (s, 6H), 2.75 (q, <i>J</i> = 7.6 Hz, 2H), 1.19 (t, <i>J</i> = 7.6 Hz, 3H)                                                                                                                                       | chiral purity = 99.8% ee (Rt 6.206 min, 270 nm); optical rotation: [α] <sub>D</sub> <sup>24</sup> (deg cm <sup>3</sup> g <sup>-1</sup> dm <sup>-1</sup> ) = +339 (c=0.2, chloroform) | N.D.                                                                                                                                  |
| <b>GSK3730808</b>                            | 396.1 [M+H] <sup>+</sup>   | <sup>1</sup> H NMR (400 MHz, DMSO-d <sub>6</sub> ) δ ppm 7.90 (s, 1H), 7.52–7.47 (m, 2H), 7.41–7.30 (m, 4H), 5.52 (s, 1H), 4.84 (t, <i>J</i> = 5.6 Hz, 1H), 3.87 (q, <i>J</i> = 14.6, 5.4 Hz, 2H), 3.70–3.58 (m, 2H), 3.39 (s, 3H), 2.75 (q, <i>J</i> = 7.6 Hz, 2H), 1.20 (t, <i>J</i> = 7.6 Hz, 3H)                                            | 99.7% (Rt 6.78 min, 254 nm)                                                                                                                                                          | N.D.                                                                                                                                  |
| <b>GSK3685032</b>                            | 421.1 [M+H] <sup>+</sup>   | <sup>1</sup> H NMR (400 MHz, DMSO-d <sub>6</sub> ) δ ppm 7.94 (s, 1H), 7.54–7.50 (m, 2H), 7.41–7.31 (m, 4H), 5.53 (s, 1H), 4.41 (d, <i>J</i> = 13.4 Hz, 2H), 3.31–3.25 (m, 2H), 2.96–2.87 (m, 1H), 2.75 (q, <i>J</i> = 7.6 Hz, 2H), 1.84 (d, <i>J</i> = 12.4 Hz, 2H), 1.38–1.24 (m, 2H), 1.20 (t, <i>J</i> = 7.6 Hz, 3H) (2H obscured by water) | 100% (Rt 4.9 min, 254 nm)                                                                                                                                                            | [M+H] <sup>+</sup> calcd for C <sub>22</sub> H <sub>24</sub> N <sub>6</sub> OS, 421.1811; found, 421.1809                             |
| <b>GSK3830052</b>                            | 473.2 [M+H] <sup>+</sup>   | <sup>1</sup> H NMR (400 MHz, MeOH-d <sub>4</sub> ) δ ppm 7.49 (d, <i>J</i> = 8.6 Hz, 2H), 7.43 (d, <i>J</i> = 8.6 Hz, 2H), 4.58 (s, 2H), 4.04 (t, <i>J</i> = 6.6 Hz, 2H), 3.50 (s, 3H), 3.32 (s, 3H), 3.24 (t, <i>J</i> = 6.6 Hz, 2H), 2.99–2.90 (m, 5H), 2.67 (s, 3H), 1.33 (t, <i>J</i> = 7.6 Hz, 3H)                                         | 99.9% (Rt 3.77 min, 254 nm)                                                                                                                                                          | N.D.                                                                                                                                  |
| <b>GSK3844831</b>                            | 551.8 [M+H] <sup>+</sup>   | <sup>1</sup> H NMR (400 MHz, MeOH-d <sub>4</sub> ) δ ppm 7.75–7.90 (m, 4H), 7.64–7.71 (m, 3H), 7.52–7.58 (m, 2H), 5.62 (s, 1H), 3.83–4.04 (m, 4H), 3.70 (t, <i>J</i> = 6.0 Hz, 2H), 2.79–3.10 (m, 8H), 2.08 (br. s, 2H), 1.32 (t, <i>J</i> = 7.6 Hz, 3H)                                                                                        | 98.9% (Rt 3.55 min, 254 nm)                                                                                                                                                          | [M+H] <sup>+</sup> calcd for C <sub>31</sub> H <sub>33</sub> N <sub>7</sub> O <sub>3</sub> , 552.2723; found, 552.2724                |
| <b>GSK3901839</b>                            | 556.2 [M+H] <sup>+</sup>   | <sup>1</sup> H NMR (400 MHz, MeOH-d <sub>4</sub> ) δ ppm 7.62 (d, <i>J</i> = 8.4 Hz, 2H), 7.30 (d, <i>J</i> = 8.1 Hz, 2H), 5.55 (s, 1H), 3.77–3.94 (m, 4H), 3.65 (t, <i>J</i> = 6.0 Hz, 2H), 2.80–2.90 (m, 3H), 2.57–2.76 (m, 5H), 1.80–2.04 (m, 2H), 1.30 (t, <i>J</i> = 7.6 Hz, 3H)                                                           | 100% (Rt 2.84 min, 254 nm)                                                                                                                                                           | [M+H] <sup>+</sup> calcd for C <sub>26</sub> H <sub>26</sub> F <sub>3</sub> N <sub>9</sub> O <sub>2</sub> , 556.2396; found, 556.2402 |

<sup>a</sup>LCMS analysis was performed on a PE Sciex Single Quadrupole 150EX or Waters Acquity SQD UPLC/MS system, using a Thermo Hypersil Gold (C18, 20 × 2.1 mm, 1.9 μm particle diameter), 4–95% CH<sub>3</sub>CN/H<sub>2</sub>O (with 0.02% TFA) over 2 min, flow rate = 1.4 mL/min at 55 °C. m/z = mass-to-charge ratio.

<sup>b</sup><sup>1</sup>H NMR spectra were recorded on a Bruker Avance or Varian Unity at 300 or 400 MHz as solutions in DMSO-d<sub>6</sub> unless otherwise stated. Chemical shifts (δ) are reported in ppm relative to an internal solvent reference. Apparent peak multiplicities are described as s (singlet), br s (broad singlet), d (doublet), dd (doublet of doublets), t (triplet), q (quartet), or m (multiplet). Coupling constants (*J*) are reported in hertz (Hz) before the integration.

<sup>c</sup>Analytical HPLC was performed on an Agilent 1100 series system using a Zorbax SB-C8 column (4.6 mm × 150 mm, 5 μm), eluting with 5–100% CH<sub>3</sub>CN/H<sub>2</sub>O (with 0.02% TFA) over 12.5 min followed by a hold for 2.5 min at a flow rate of 1.5 mL/min at 40 °C. The retention time (Rt) is expressed in minutes at a UV detection of 254 or 270 nm. Chiral purity was performed using a Lux-2 cellulose column (4.6 mm × 150 mm, 5 μm), eluting with 100:0.1 methanol:isopropylamine (isocratic) at a flow rate of 1.0 mL/min and UV detection of 270 nm.

<sup>d</sup>High resolution mass spectrometry (HRMS) was performed by either a time-of-flight mass spectrometer or Fourier transform mass spectrometer using electrospray (ES) techniques. m/z = mass-to-charge ratio. N.D. = not determined.
